# Supplementary material for: An oxygen-sensitive luminescent Dy(iii) complex
Source: Royal Society of Chemistry journal article supplement (doi:10.1039/c6dt01057a), 2016-01-01
Supplement: c6dt01057a1.pdf [file c6dt01057a1.pdf]

## Electronic Supplementary Information (ESI) – Table of Contents

### An oxygen-sensitive luminescent Dy(III) complex

Hidetaka Nakai,<sup>\*abc</sup> Juncheol Seo,<sup>a</sup> Kazuhiro Kitagawa,<sup>ac</sup> Takahiro Goto,<sup>a</sup>  
Takahiro Matsumoto<sup>abc</sup> and Seiji Ogo<sup>\*abc</sup>

<sup>a</sup> Department of Chemistry and Biochemistry, Graduate School of Engineering, Kyushu University,  
744 Moto-oka, Nishi-ku, Fukuoka 819-0395, Japan

<sup>b</sup> Centre for Small Molecule Energy, Kyushu University, 744 Moto-oka, Nishi-ku, Fukuoka 819-0395,  
Japan

<sup>c</sup> International Institute for Carbon-Neutral Energy Research (WPI-I2CNER), Kyushu University,  
744 Moto-oka, Nishi-ku, Fukuoka 819-0395, Japan

#### Tables

|                                                                                                                           |     |
|---------------------------------------------------------------------------------------------------------------------------|-----|
| <b>Table S1</b> Crystallographic data for <b>1<sup>Dy</sup></b> .....                                                     | S 2 |
| <b>Table S2</b> Continuous shape measures (CSM) values calculated for the Dy <sup>3+</sup> in <b>1<sup>Dy</sup></b> ..... | S 3 |

#### Figures

|                                                                                                               |     |
|---------------------------------------------------------------------------------------------------------------|-----|
| <b>Fig. S1</b> CIE chromaticity diagram of <b>1<sup>Dy</sup></b> .....                                        | S 4 |
| <b>Fig. S2</b> Absorption and excitation spectra of <b>1<sup>Dy</sup></b> .....                               | S 5 |
| <b>Fig. S3</b> Luminescence decay curves of <b>1<sup>Dy</sup></b> .....                                       | S 6 |
| <b>Fig. S4</b> Luminescence spectra of <b>1<sup>Dy</sup>/PS</b> .....                                         | S 7 |
| <b>Fig. S5</b> Stern–Volmer plot ( $I_0/I$ vs. [O <sub>2</sub> ]) for <b>1<sup>Dy</sup>/PS</b> .....          | S 7 |
| <b>Fig. S6</b> Luminescence spectrum of <b>1<sup>Gd</sup></b> .....                                           | S 8 |
| <b>Fig. S7</b> Luminescence spectra of <b>1<sup>Dy</sup></b> at –100 °C .....                                 | S 9 |
| <b>Fig. S8</b> Stern–Volmer plots ( $I_0/I$ vs. [O <sub>2</sub> ]) for <b>1<sup>Dy</sup></b> at –100 °C ..... | S10 |
| <b>Fig. S9</b> Luminescence decay curve of <b>1<sup>Gd</sup></b> .....                                        | S11 |
| <b>Fig. S10</b> Luminescence spectra of <b>1<sup>Dy</sup></b> ( $\lambda_{\text{ex}}$ = 470 nm) .....         | S11 |

## Tables

**Table S1** Crystallographic data for **1<sup>Dy</sup>**

|                                                    | <b>1<sup>Dy</sup></b>                                            |
|----------------------------------------------------|------------------------------------------------------------------|
| Formula                                            | C <sub>37</sub> H <sub>50</sub> N <sub>3</sub> O <sub>4</sub> Dy |
| <i>F</i> <sub>w</sub>                              | 763.32                                                           |
| Crystal system                                     | triclinic                                                        |
| Space group                                        | <i>P</i> -1 (No. 2)                                              |
| <i>a</i> (Å)                                       | 7.9076(14)                                                       |
| <i>b</i> (Å)                                       | 14.308(3)                                                        |
| <i>c</i> (Å)                                       | 16.300(3)                                                        |
| $\alpha$ (deg)                                     | 68.911(6)                                                        |
| $\beta$ (deg)                                      | 76.832(9)                                                        |
| $\gamma$ (deg)                                     | 85.214(9)                                                        |
| <i>V</i> (Å <sup>3</sup> )                         | 1675.4(6)                                                        |
| <i>Z</i>                                           | 2                                                                |
| $\mu$ (cm <sup>-1</sup> )                          | 22.77                                                            |
| <i>F</i> (000)                                     | 782.00                                                           |
| <i>D</i> <sub>calcd</sub> (g/cm <sup>3</sup> )     | 1.513                                                            |
| Temperature (K)                                    | 112                                                              |
| Reflections collected                              | 20482                                                            |
| Independent reflection                             | 7646                                                             |
|                                                    | ( <i>R</i> <sub>int</sub> = 0.032)                               |
| Data/parameters                                    | 7646/412                                                         |
| <i>R</i> <sub>1</sub> [ <i>I</i> > 2σ( <i>I</i> )] | 0.0421                                                           |
| <i>wR</i> <sub>2</sub> (all data)                  | 0.1283                                                           |
| Goodness-of-fit                                    | 1.166                                                            |

**Table S2** Continuous shape measures (CSM) values calculated for the Dy<sup>3+</sup> in **1**<sup>Dy</sup>

|                            | HP-7                                              | HPY-7  | PBPY-7 | COC-7 | CTPR-7 | JPBPY-7 | JETPY-7 |
|----------------------------|---------------------------------------------------|--------|--------|-------|--------|---------|---------|
| <b>1</b> <sup>Dy</sup>     | 33.596                                            | 20.405 | 8.428  | 0.919 | 2.315  | 11.180  | 14.067  |
| HP-7 (D <sub>7h</sub> )    | Heptagon                                          |        |        |       |        |         |         |
| HPY-7 (C <sub>6v</sub> )   | Hexagonal pyramid                                 |        |        |       |        |         |         |
| PBPY-7 (D <sub>5h</sub> )  | Pentagonal bipyramid                              |        |        |       |        |         |         |
| COC-7 (C <sub>3v</sub> )   | Monocapped octahedron (Capped octahedron)         |        |        |       |        |         |         |
| CTPR-7 (C <sub>2v</sub> )  | Monocapped trigonal prism (Capped trigonal prism) |        |        |       |        |         |         |
| JPBPY-7 (D <sub>5h</sub> ) | Johnson pentagonal bipyramid (J13)                |        |        |       |        |         |         |
| JETPY-7 (C <sub>3v</sub> ) | Johnson elongated triangular pyramid (J7)         |        |        |       |        |         |         |

## Figures

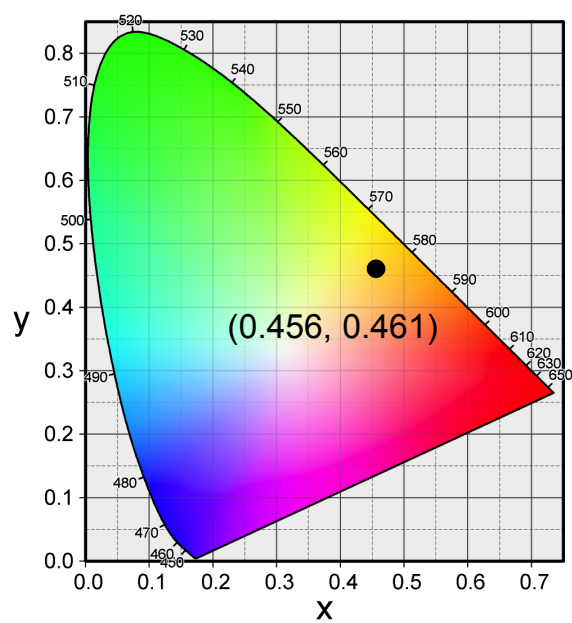

**Fig. S1** CIE 1931 chromaticity diagram of **1**<sup>Dy</sup> in THF at room temperature ( $\lambda_{\text{ex}} = 300 \text{ nm}$ ).

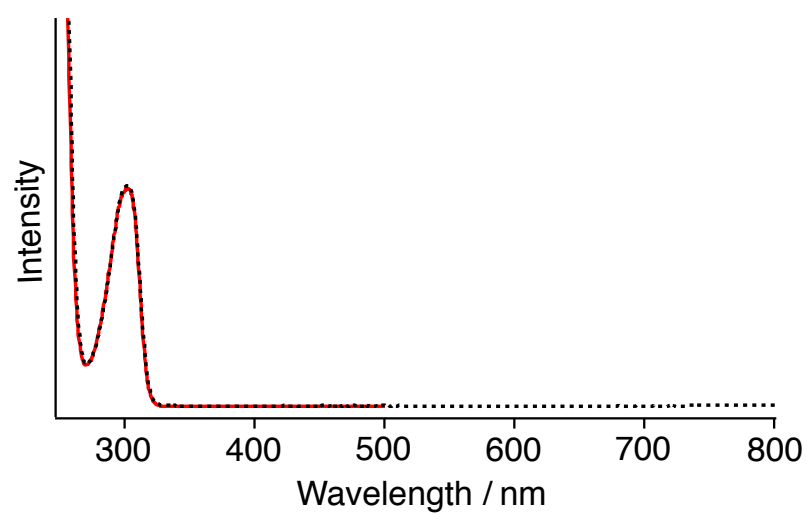

**Fig. S2** Absorption (black dot) and excitation (red) spectra of **1<sup>Dy</sup>** under air in THF at room temperature. The excitation spectrum was detected at 575 nm.

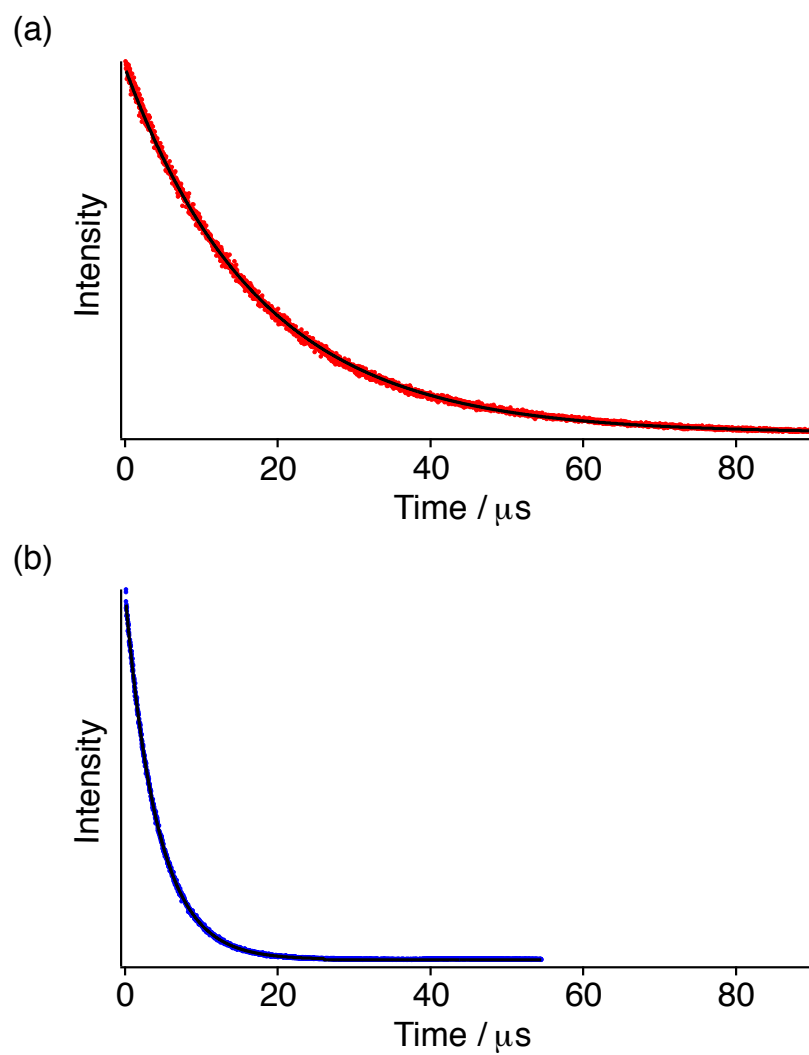

**Fig. S3** Luminescence decay curves of  $1^{\text{Dy}}$  under (a)  $\text{N}_2$  (red, 17.7  $\mu\text{s}$ ) and (b)  $\text{O}_2$  (blue, 4.1  $\mu\text{s}$ ) in THF at room temperature. The decay was monitored by a TBX-850 detector (250–850 nm) with an L42 color filter ( $\lambda_{\text{ex}} = 300 \text{ nm}$ ). Fitted by single exponential curve (black).

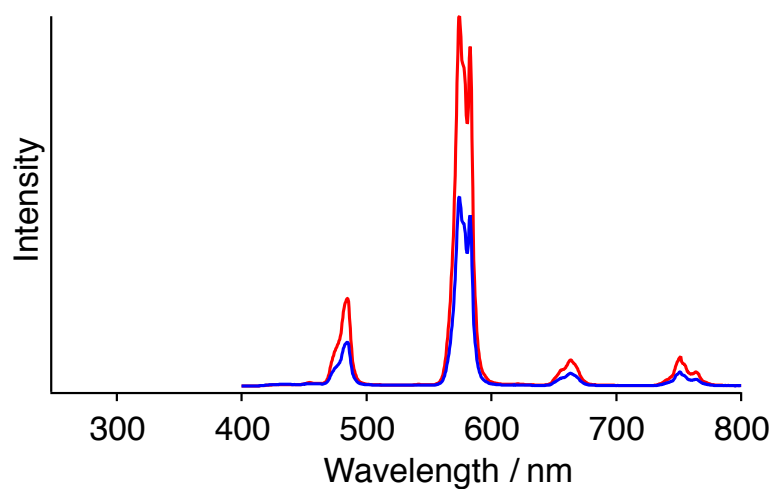

**Fig. S4** Corrected luminescence spectra of  $1^{\text{Dy}}/\text{PS}$  under  $\text{N}_2$  (red) and  $\text{O}_2$  (blue) at room temperature ( $\lambda_{\text{ex}} = 300 \text{ nm}$ ).

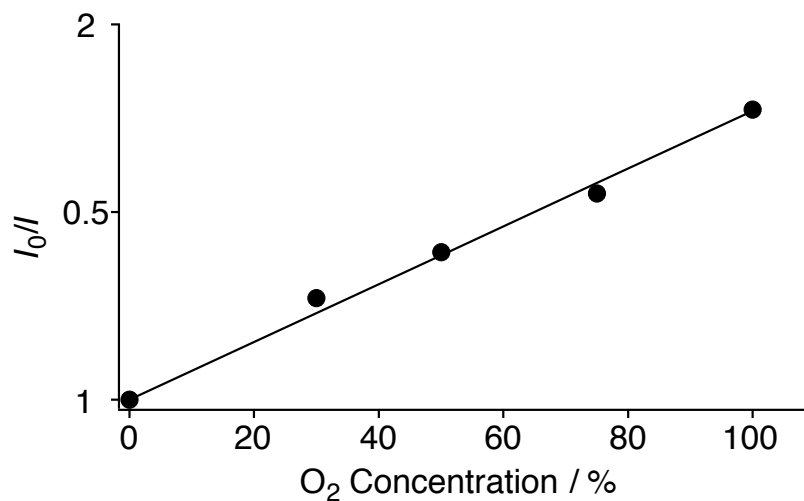

**Fig. S5** Stern–Volmer plot of the luminescence intensity against the oxygen concentration for  $1^{\text{Dy}}/\text{PS}$  ( $I_0/I$  vs.  $[\text{O}_2]$ ). The  $I_0$  and  $I$  are the luminescence intensities at 0% of  $\text{O}_2$  and at the indicated  $\text{O}_2$  concentrations, respectively. The luminescence intensities were monitored at 575 nm.

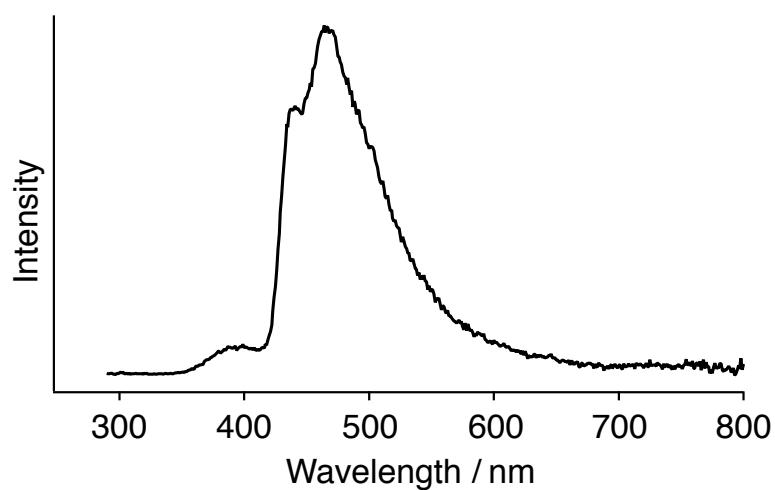

**Fig. S6** Corrected luminescence spectrum of **1**<sup>Gd</sup> under Ar in the crystalline-state at room temperature. ( $\lambda_{\text{ex}} = 250$  nm). The spectrum was acquired with a delay time of 50  $\mu\text{s}$  in order to show the phosphorescence from the lowest triplet state (T1) of the ligand clearly.

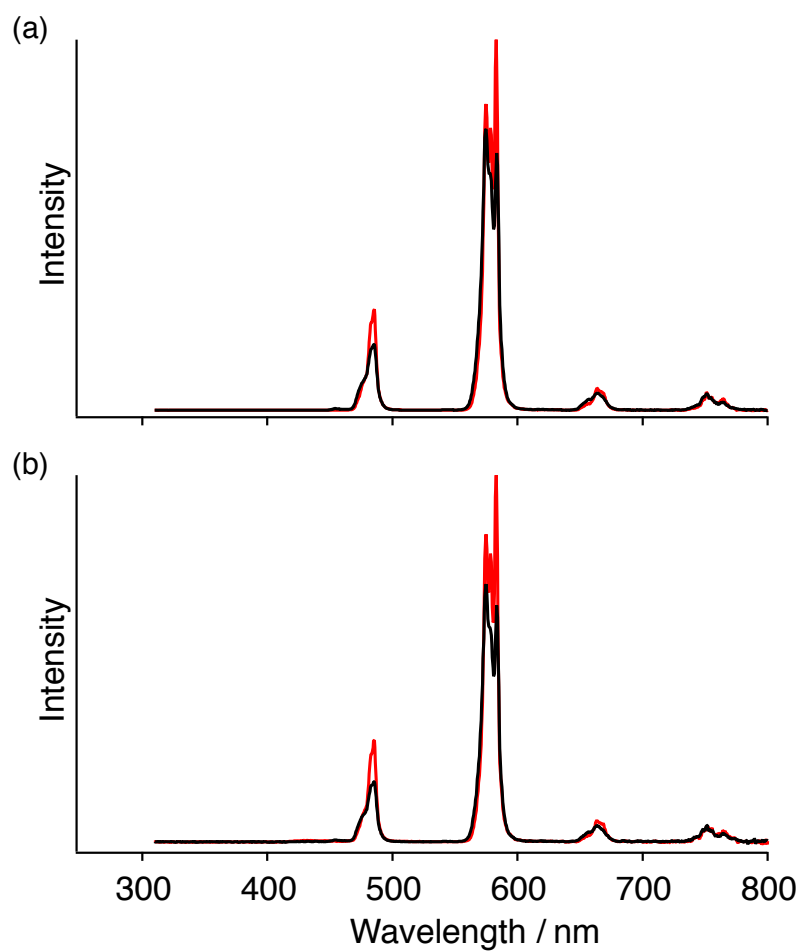

**Fig. S7** Corrected luminescence spectra of **1**<sup>Dy</sup> under (a) N<sub>2</sub> and (b) O<sub>2</sub> at room temperature (black) and -100 °C (red) in THF ( $\lambda_{\text{ex}}$  = 300 nm).

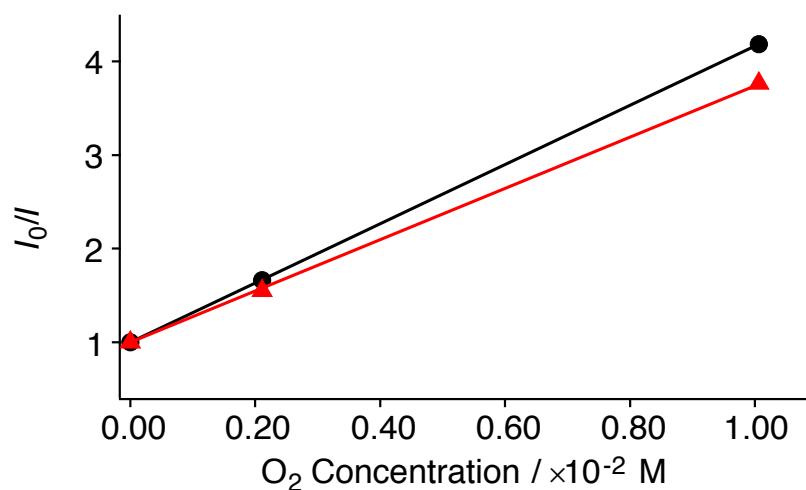

**Fig. S8** Stern–Volmer plots of the luminescence intensity ( $I_0/I$ ) against the oxygen concentration ( $[O_2]$ ) for  $\mathbf{1}^{\text{Dy}}$  at  $-100\text{ }^{\circ}\text{C}$  (▲) ( $1.5 \times 10^{-5}\text{ M}$ ,  $K_{\text{SV}} = 274\text{ M}^{-1}$ ,  $R^2 = 0.9998$ ) and room temperature (●) ( $1.5 \times 10^{-5}\text{ M}$ ,  $K_{\text{SV}} = 317\text{ M}^{-1}$ ,  $R^2 = 0.9999$ ). The  $I_0$  and  $I$  are the luminescence intensities at 0% of  $O_2$  and at the indicated  $O_2$  concentrations, respectively. The luminescence intensities were monitored at 485 nm.

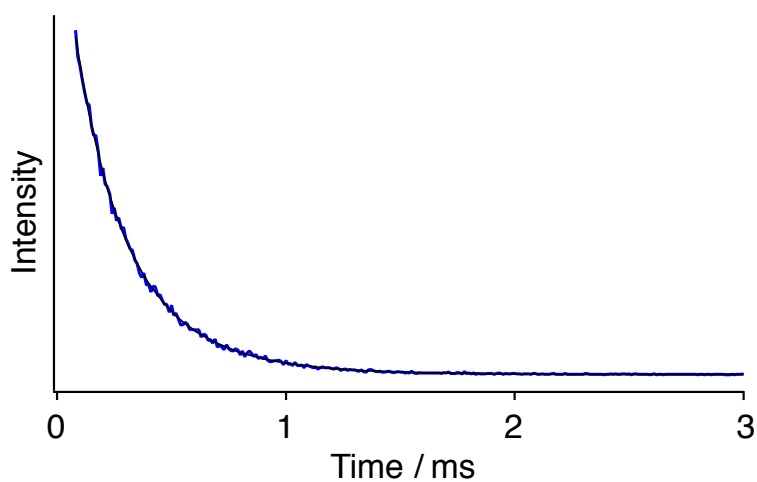

**Fig. S9** Luminescence decay curve of  $1^{\text{Gd}}$  under Ar (blue) in the crystalline-state at room temperature. The decay was monitored at 436 nm ( $\lambda_{\text{ex}} = 250$  nm). The decay curve was fitted by bi-exponential curve (black:  $\tau_1 = 315$   $\mu\text{s}$ , amplitude  $A_1 = 0.704$ ;  $\tau_2 = 155$   $\mu\text{s}$ , amplitude  $A_1 = 0.296$ ) since the emission at 436 nm contains two emissions ( $\lambda_{\text{em}}^{\text{max}} = 397$  and 466 nm: see Fig. S6).

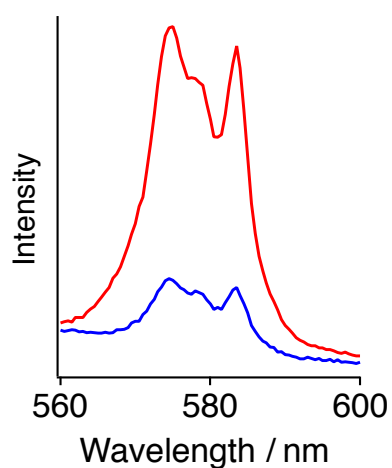

**Fig. S10** Corrected luminescence spectra of  $1^{\text{Dy}}$  ( ${}^4\text{F}_{9/2} \rightarrow {}^6\text{H}_{13/2}$ ) under  $\text{N}_2$  (red) and  $\text{O}_2$  (blue) in THF at room temperature ( $\lambda_{\text{ex}} = 470$  nm).
